# Supplementary material
Source: PubMed Central journal article supplement (PMC1366870)
Supplement: aac_50_2_702__1.pdf [file aac_50_2_702__1.pdf]

1 Table 1. Primers used for PCR assays and for DNA-DNA hybridization.

| Tetracycline<br>resistance gene | Primer sequence (5' - 3')                                       | Annealing temp<br>(°C) | Amplicon<br>size (bp) | Accession #<br>or source |
|---------------------------------|-----------------------------------------------------------------|------------------------|-----------------------|--------------------------|
| <i>tet(A)</i>                   | GCT ACA TCC TGC TTG CCT TC<br>CAT AGA TCG CCG TGA AGA GG        | 50                     | 210                   | X61367                   |
| <i>tet(B)</i>                   | TTG GTT AGG GGC AAG TTT TG<br>GTA ATG GGC CAA TAA CAC CG        | 50                     | 659                   | AF162223                 |
| <i>tet(B)out</i>                | AAA GAG TCA TCA GCA AGG TGC T<br>TAT GCG GTG AAA TCT CTC CTG C  | 50                     | 4985                  | This work                |
| <i>tetR(B)</i>                  | GAA TAA GAA GGC TGG CTC<br>AAC AGC GCA TTA GAG CTG              | 50                     | 534                   | AF162223                 |
| <i>tet(C)</i>                   | CTT GAG AGC CTT CAA CCC AG<br>ATG GTC GTC ATC TAC CTG CC        | 50                     | 418                   | J01749                   |
| <i>tet(D)</i>                   | AAA CCA TTA CGG CAT TCT GC<br>GAC CGG ATA CAC CAT CCA TC        | 50                     | 787                   | L06798                   |
| <i>tet(E)</i>                   | TCC ATA CGC GAG ATG ATC TCC<br>CGA TTA CAG CTG TCA GGT GGG      | 52                     | 442                   | L06940                   |
| <i>tet(G)</i>                   | GCT GGA TGA TGC ATT GCG CG<br>ATG GTC TGC GTA GTA TTG GC        | 52                     | 554                   | S52437                   |
| <i>tet(H)</i>                   | ATA CTG CTG ATC ACC GT<br>TCC CAA TAA GCG ACG CT                | 48                     | 1076                  | AJ245947                 |
| <i>tet(K)</i>                   | TCG ATA GGA ACA GCA GTA<br>CAG CAG ATC CTA CTC CTT              | 48                     | 169                   | U38656                   |
| <i>tet(L)</i>                   | TTA GAA ATC CCT TTG AGA<br>ATG TGA ATA CAT CCT ATT              | 48                     | 1379                  | AF503772                 |
| <i>tet(L)out</i>                | TTA CTT GAT CAA AGG TTG TT<br>AAT CAT TTG CAA TAT CAG GT        | 50                     | 4569                  | This work                |
| <i>tet(M/O/S)</i>               | ATA GAY ACG CCA GGM CAT AT<br>GAA GCC CAG AAA GGA TTY GGY       | 50                     | 1100                  | 1                        |
| <i>tet(O)</i>                   | TAA CTT AGG CAT TCT GGC TC<br>TCA AGC AGA CTC CCT GCC CAT TTG T | 55                     | 1801                  | M18896                   |
| <i>tet(Y)-INT</i>               | ATG GGT GCT TTA TAT CGG CC                                      | 60                     | -                     | AF070999                 |

2

3

4

5 (1) Roberts, M. C., Y. Pang, D. E. Riley, S. L. Hillier, R. C. Berger, and J. N.

6 Krieger. 1993. Detection of Tet M and Tet O tetracycline resistance genes by

7 polymerase chain reaction. *Molec. Cell. Probes* 7:387-393.

8
